# Supplementary material
Source: PubMed Central journal article supplement (PMC2872380)
Supplement: 0910827107_pnas.0910827107_SI.pdf [file 0910827107_pnas.0910827107_SI.pdf]

# Supporting Information

Buckley et al. 10.1073/pnas.0910827107

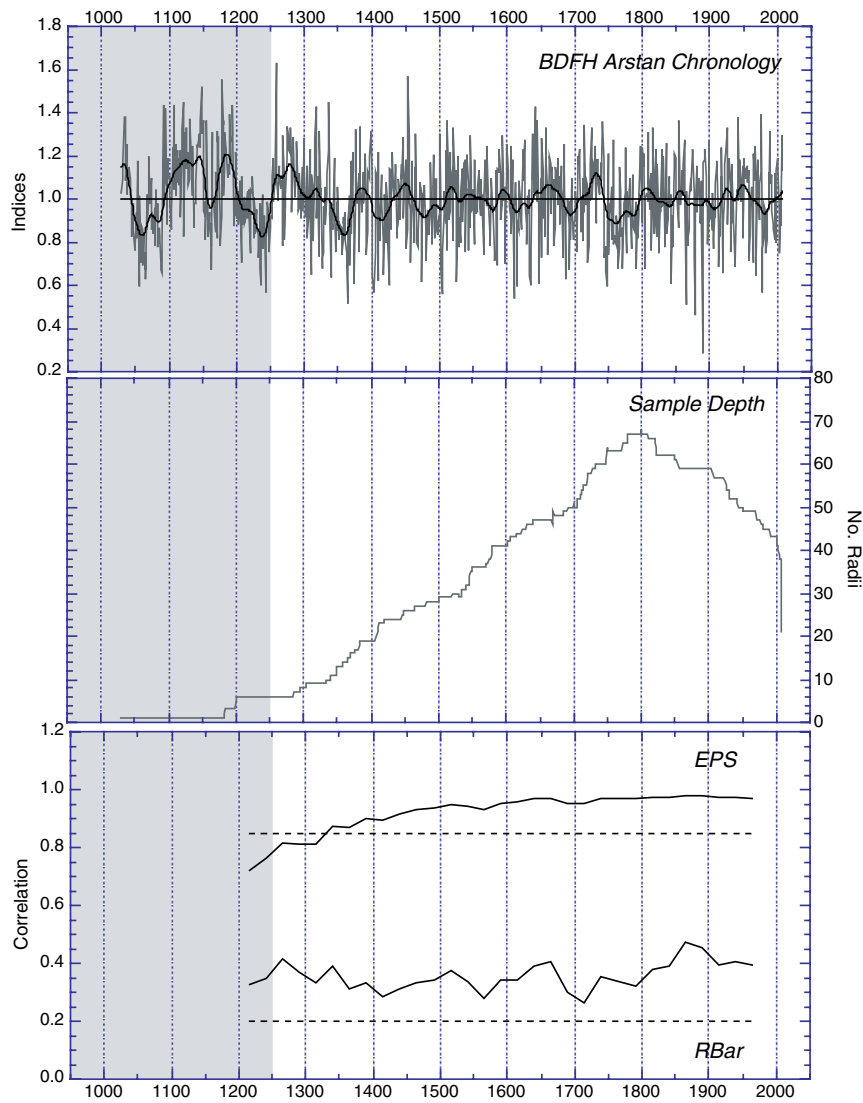

**Fig. S1.** The Bidoup Nui Ba *Fokienia hodginsii* (BDFH) *Fokienia hodginsii* chronology indices are shown in the top plot, with sample depth (center) and two measures of signal strength through time shown in the bottom plot: the Expressed Population Signal and the mean  $R_{bar}$ . The dashed lines show the level of accepted confidence for each of these two statistics. The shaded gray box indicates the period from 1030 to 1250 CE when the sample depth is low and less confidence is placed in the chronology. This is the longest and most well replicated tree ring record yet produced from the tropics.



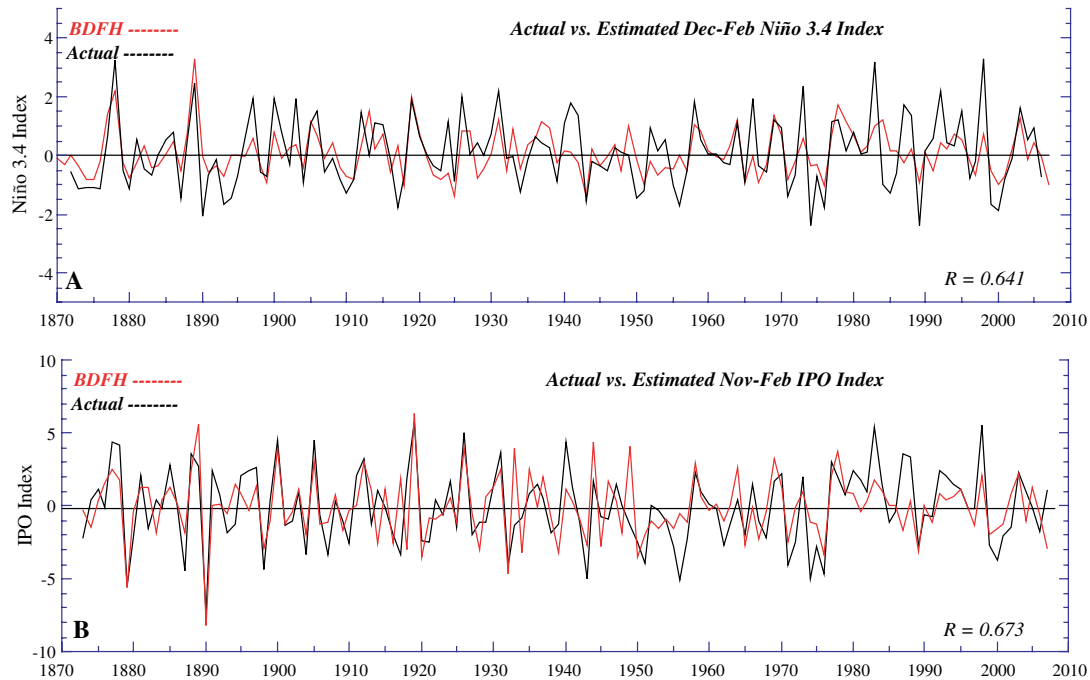

**Fig. 54.** Comparison plots between BDFH and (A) Niño 3.4 Index, and (B) against the Interdecadal Pacific Oscillation Index. Correlation coefficients are shown in the lower right corner of each plot. The relationship with both records shows remarkable stability throughout the entire period of record.

**Table S1.** Calibration and verification period statistics for the reconstructed PDSI values from the nine-gridbox average over southern Vietnam and Cambodia

| Test                           | Score              | t stat                    | Probability       |
|--------------------------------|--------------------|---------------------------|-------------------|
| Equality of means              | 0.000 (-0.048)     | 0.000 (-0.122)            | 0.99570 (0.89869) |
| Cross products mean            | 1.884 (1.840)      | 3.949 (3.115)             | 0.00017 (0.00167) |
| Sign test                      | 35+ 11- (33+ 12-)  | <sup>z</sup> 3.391(2.981) | 0.00035 (0.00143) |
| Pearson correlation            | $r = 0.581(0.568)$ | 4.733 (4.524)             | 0.00002 (0.00004) |
| Robust correlation             | $r = 0.586(0.550)$ | 4.792 (4.323)             | 0.00002 (0.00006) |
| Spearman correlation           | $r = 0.603(0.589)$ | 5.018 (4.778)             | 0.00001 (0.00002) |
| Kendall TAU                    | $t = 0.424(0.400)$ | <sup>z</sup> 4.157(3.874) | 0.00002 (0.00005) |
| Reduction of error             | 0.377 (0.322)      |                           |                   |
| Coefficient of efficiency      | 0.337 (0.322)      |                           |                   |
| Verification period 1915–1959. |                    |                           |                   |
| Test                           | Score              | t stat                    | Probability       |
| Equality of means              | 0.143 (-0.005)     | 0.497 (-0.016)            | 0.62533 (0.98420) |
| Cross products mean            | 1.149 (1.334)      | 3.913 (4.010)             | 0.00020 (0.00015) |
| Sign test                      | 34+ 11- (30+ 14-)  | <sup>z</sup> 3.280(2.261) | 0.00052 (0.01187) |
| Pearson correlation            | $r = 0.602(0.575)$ | 4.941 (4.550)             | 0.00001 (0.00003) |
| Robust correlation             | $r = 0.614(0.574)$ | 5.095 (4.547)             | 0.00001 (0.00003) |
| Spearman correlation           | $r = 0.632(0.574)$ | 5.348 (4.539)             | 0.00000 (0.00004) |
| Kendall TAU                    | $t = 0.442(0.397)$ | <sup>z</sup> 4.285(3.803) | 0.00001 (0.00007) |
| Reduction of error             | 0.419 (0.328)      |                           |                   |
| Coefficient of efficiency      | 0.303 (0.327)      |                           |                   |

The calibration period is 1960–2005, verification on 1915–1959, undifferenced (1st-differenced), <sup>z</sup> = z-score. All tests are passed, even for Reduction of Error and Coefficient of Efficiency in the verification period, the latter a notoriously difficult test to pass. The reconstruction shows remarkable stability across both time periods, in spite of data quality issues within the PDSI instrumental record itself.
